# Supplementary material
Source: PubMed Central journal article supplement (PMC3120107)
Supplement: NIHMS86696-supplement-1_si_001.pdf [file NIHMS86696-supplement-1_si_001.pdf]

## Supporting Information

### Experimental Procedures

**Methods:** Gas chromatography coupled mass spectrometry (GC-MS) was carried out on Agilent Technologies 6890N Network GC-system (Agilent, Palo Alto, CA, USA) GC with the Agilent Technologies 5975 inert MS detection and autosampler (Agilent). The injection temperature was set to 275 °C. Separation was performed on a CP-Sil 8 capillary column (50 m × 0.25 mm I.D., 0.25 µm film thickness). Helium was used as the carrier gas at a flow of 1.2 mL/min. The split was opened after 2 min. The column temperature for the CP Sil-8 was programmed from 45°C to 245°C with 20°C/min. The final temperature was held for 10 minutes. Detection was based on electron ionization (EI) in the full scan mode ( $m/z$  50-500). Nitrogen was used as reagent gas at a flow rate of 3 mL/min. The ion source temperature was 230°C.

$^1\text{H}$ ,  $^{13}\text{C}$  and  $^{19}\text{F}$  NMR spectra recorded on 300 MHz NMR spectrometer (Bruker, Billerica, MA, USA), using chloroform-D ( $\text{CDCl}_3$ ) as the solvent. The processing parameters were 300 MHz for  $^1\text{H}$ , 75.5 MHz for  $^{13}\text{C}$  and 282 for  $^{19}\text{F}$  and a digital resolution of 0.20 Hz for  $^1\text{H}$ , 0.61 Hz for  $^{13}\text{C}$  and 0.65 Hz for  $^{19}\text{F}$ .

Electrospray ionization (ESI) ( $m/z$  100.0-1000.0) of the salts was performed as flow injection analysis on a Thermo (Waltham, Massachusetts, USA) LCQ Deca quadrupole ion trap MS. The mobile phases used were 0.1% formic acid and methanol. The gradient was started at 90% water and over 25 min went to 5% solvent water.

**Table S1:**  $^1\text{H}$  NMR chemical shifts  $\delta$  [ppm] and couplings  $^nJ$  ( $^1\text{H}^1\text{H}$ ,  $^1\text{H}^{19}\text{F}$ ) [Hz] of F-PBDEs 35-F5' (**3d**), 47-F3 (**3g**), 99-F3' (**3i**), PBDEs 35 (**3d**), 47 (**3f**) and 99 (**3h**) in  $\text{CDCl}_3$ .

| BZ/BZL | #  | Chemical shifts $\delta$ [ppm] and $^1\text{H}^1\text{H}$ , $^1\text{H}^{19}\text{F}$ couplings $J$ [Hz]                                                                                                                                                                                                                                                                                                                                                                                                                                                                                                                                                                                                   |
|--------|----|------------------------------------------------------------------------------------------------------------------------------------------------------------------------------------------------------------------------------------------------------------------------------------------------------------------------------------------------------------------------------------------------------------------------------------------------------------------------------------------------------------------------------------------------------------------------------------------------------------------------------------------------------------------------------------------------------------|
| 17-F5' | 3a | $\delta$ 7.80 (H-3, 1H, <i>d</i> , $^4J_{\text{H,H}}=2.3\text{Hz}$ ), 7.59 (H-3', 1H, <i>dd</i> , $^3J_{\text{H,H}}=8.8\text{Hz}$ , $^4J_{\text{H,F}}=5.9\text{Hz}$ ), 7.42 (H-5, 1H, <i>dd</i> , $^3J_{\text{H,H}}=8.7\text{Hz}$ , $^4J=2.3\text{Hz}$ ), 6.81 (H-6, 1H, <i>d</i> , $^3J_{\text{H,H}}=8.7\text{Hz}$ ), 6.78 (H-4', 1H, <i>ddd</i> , $^3J_{\text{H,H}}=8.8\text{Hz}$ , $^3J_{\text{H,F}}=7.7\text{Hz}$ , $^4J_{\text{H,H}}=2.8\text{Hz}$ ), 6.52 (H-6', 1H, <i>dd</i> , $^3J_{\text{H,F}}=9.3\text{Hz}$ , $^4J_{\text{H,H}}=2.8\text{Hz}$ );                                                                                                                                                |
| 25-F5' | 3b | $\delta$ 7.79 (H-3, 1H, <i>d</i> , $^4J_{\text{H,H}}=2.3\text{Hz}$ ), 7.43 (H-5, 1H, <i>dd</i> , $^3J_{\text{H,H}}=8.6\text{Hz}$ , $^4J_{\text{H,H}}=2.3\text{Hz}$ ), 6.99 (H4', 1H, <i>ddd</i> , $^3J_{\text{H,F}}=7.9\text{Hz}$ , $^4J_{\text{H,H}}=2.2\text{Hz}$ , $^4J_{\text{H,H}}=1.7\text{Hz}$ ), 6.94 (H6, 1H, <i>d</i> , $^3J_{\text{H,H}}=8.6\text{Hz}$ ), 6.84 (H2', 1H, <i>ddd</i> , $^4J_{\text{H,H}}=2.2\text{Hz}$ , $^4J_{\text{H,H}}=1.7\text{Hz}$ , $^5J_{\text{H,F}}=1.3\text{Hz}$ );                                                                                                                                                                                                    |
| 28-F3' | 3c | $\delta$ 7.78 (H-3, 1H, <i>d</i> , $^4J_{\text{H,H}}=2.3\text{Hz}$ ), 7.46 (H-5', 1H, <i>dd</i> , $^3J_{\text{H,H}}=8.8\text{Hz}$ , $^4J_{\text{H,F}}=7.0\text{Hz}$ ), 7.42 (H-5, 1H, <i>dd</i> , $^3J_{\text{H,H}}=8.6\text{Hz}$ , $^4J_{\text{H,H}}=2.3\text{Hz}$ ), 6.91 (H-6, 1H, <i>d</i> , $^4J_{\text{H,H}}=2.3$ ), 6.71 (H-2', 1H, <i>dd</i> , $^3J_{\text{H,F}}=9.4\text{Hz}$ , $^4J_{\text{H,H}}=2.8\text{Hz}$ ), 6.63 (H-6', 1H, <i>ddd</i> , $^3J_{\text{H,H}}=8.8\text{Hz}$ , $^4J_{\text{H,H}}=2.8\text{Hz}$ , $^5J_{\text{H,F}}=1.1\text{Hz}$ );                                                                                                                                            |
| 35     | 3d | $\delta$ 7.57 (H5, 1H, <i>d</i> , $^3J_{\text{H,H}}=8.8\text{Hz}$ ), 7.30 (H4', 1H, <i>ddd</i> , $^3J_{\text{H,H}}=8.0\text{Hz}$ , $^4J_{\text{H,H}}=1.7\text{Hz}$ , $^4J_{\text{H,H}}=1.3\text{Hz}$ ), 7.27 (H-2, 1H, <i>d</i> , $^4J_{\text{H,H}}=2.8\text{Hz}$ ), 7.26 (H-5', 1H, <i>dd</i> , $^3J_{\text{H,H}}=8.0\text{Hz}$ , $^3J_{\text{H,H}}=7.6\text{Hz}$ ), 7.16 (H-2', 1H, <i>dd</i> , $^4J_{\text{H,H}}=2.4\text{Hz}$ , $^4J_{\text{H,H}}=1.7\text{Hz}$ ), 6.95 (H-6', 1H, <i>ddd</i> , $^3J_{\text{H,H}}=7.6\text{Hz}$ , $^4J_{\text{H,H}}=2.4\text{Hz}$ , $^4J_{\text{H,H}}=1.3\text{Hz}$ ), 6.84 (H-6, 1H, <i>dd</i> , $^3J_{\text{H,H}}=8.8\text{Hz}$ , $^4J_{\text{H,H}}=2.8\text{Hz}$ ); |
| 35-F5' | 3e | $\delta$ 7.61 (H-5, 1H, <i>d</i> , $^3J_{\text{H,H}}=8.8\text{Hz}$ ), 7.31 (H-2, 1H, <i>d</i> , $^4J_{\text{H,H}}=2.8\text{Hz}$ ), 7.04 (H-4', 1H, <i>ddd</i> , $^3J_{\text{H,F}}=7.9\text{Hz}$ , $^4J_{\text{H,H}}=2.2\text{Hz}$ , $^4J_{\text{H,H}}=1.7\text{Hz}$ ), 6.93 (H-2', 1H, <i>ddd</i> , $^4J_{\text{H,H}}=2.2\text{Hz}$ , $^4J_{\text{H,H}}=1.7\text{Hz}$ , $^5J_{\text{H,F}}=1.2\text{Hz}$ ), $\delta$ 6.88 (H-6, 1H, <i>dd</i> , $^3J=8.8\text{Hz}$ , $^4J=2.8\text{Hz}$ ), 6.66 (H-6', 1H, <i>dt</i> , $^3J_{\text{H,F}}=9.6\text{Hz}$ , $^4J_{\text{H,2H}}=2.2\text{Hz}$ );                                                                                                                |
| 47     | 3f | $\delta$ 7.79 (H-3/3', 2H, <i>d</i> , $^4J=2.3\text{Hz}$ ), 7.38 (H5/5', 2H, <i>dd</i> , $^3J=8.7\text{Hz}$ , $^4J=2.3\text{Hz}$ ), 6.72 (H6/6', 2H, <i>d</i> , $^3J=8.7$ );                                                                                                                                                                                                                                                                                                                                                                                                                                                                                                                               |
| 47-F3  | 3g | $\delta$ 7.81 (H-3', 1H, <i>d</i> , $^4J_{\text{H,H}}=2.3\text{Hz}$ ), 7.43 (H-5, 1H, <i>dd</i> , $^3J_{\text{H,H}}=8.9\text{Hz}$ , $^4J_{\text{H,F}}=7.4\text{Hz}$ ), 7.42 (H-5', 1H, <i>dd</i> , $^3J_{\text{H,H}}=8.6$ , $^4J_{\text{H,H}}=2.3$ ), 6.82 (H-6', 1H, <i>d</i> , $^3J_{\text{H,H}}=8.6\text{Hz}$ ), 6.48 (H-6, 1H, <i>dd</i> , $^3J_{\text{H,H}}=8.9\text{Hz}$ , $^5J_{\text{H,F}}=1.8\text{Hz}$ );                                                                                                                                                                                                                                                                                        |
| 99     | 3h | $\delta$ 7.89 (H-3, 1H, <i>s</i> ), 7.81 (H-3', 1H, <i>d</i> , $^4J_{\text{H,H}}=2.3\text{Hz}$ ), 7.43 (H-5', 1H, <i>dd</i> , $^3J_{\text{H,H}}=8.7\text{Hz}$ , $^4J_{\text{H,F}}=2.3\text{Hz}$ ), 6.98 (H-6, 1H, <i>s</i> ), 6.81 (H-6', 1H, <i>d</i> , $^3J_{\text{H,H}}=8.7\text{Hz}$ );                                                                                                                                                                                                                                                                                                                                                                                                                |
| 99-F3' | 3i | $\delta$ 7.90 (H-3, 1H, <i>s</i> ), 7.49 (H-5', 1H, <i>dd</i> , $^3J_{\text{H,H}}=8.9\text{Hz}$ , $^4J_{\text{H,F}}=7.3\text{Hz}$ ), 7.10 (H-6, 1H, <i>s</i> ), $\delta$ 6.59 (H-6', 1H, <i>dd</i> , $^3J_{\text{H,H}}=8.9\text{Hz}$ , $^5J_{\text{H,F}}=1.8\text{Hz}$ );                                                                                                                                                                                                                                                                                                                                                                                                                                  |

**Table S2:**  $^{19}\text{F}$  NMR chemical shifts  $\delta$  [ppm] and couplings  ${}^nJ$  ( ${}^1\text{H}^1\text{H}$ ,  ${}^1\text{H}^{19}\text{F}$ ) [Hz] of F-PBDEs 35-F5' (**3d**), 47-F3 (**3g**), 99-F3' (**3i**), PBDEs 35 (**3d**), 47 (**3f**) and 99 (**3h**) in  $\text{CDCl}_3$ .

| BZL    | #  | $\delta$ [ppm] | multiplicity | ${}^3J(\text{F,H})$ | ${}^4J(\text{F,H})$ | ${}^5J(\text{F,H5})$ |
|--------|----|----------------|--------------|---------------------|---------------------|----------------------|
| 17-F5' | 3a | -111.33        | <i>ddd</i>   | H-6'=9.3, H-4'=7.7  | H-3'=5.9            |                      |
| 25-F5' | 3b | -108.88        | <i>ddd</i>   | H-6'=9.7, H-4'=7.9  |                     | H-2'=1.7             |
| 28-F3' | 3c | -103.86        | <i>ddd</i>   | H-2'=9.4            | H-5'=7.0            | H-6'=1.1             |
| 35-F5' | 3e | -108.73        | <i>ddd</i>   | H-6'=9.6, H-4'=7.9  |                     | H-2'=1.2             |
| 47-F3  | 3g | -95.27         | <i>dd</i>    |                     | H-5=7.4             | H-6=1.8              |
| 99-F3' | 3i | -94.68         | <i>dd</i>    |                     | H-5'=7.3            | H-6'=1.8             |

**Table S3:**  $^{13}\text{C}$  NMR chemical shifts  $\delta$  [ppm] and couplings  $^nJ(^{13}\text{C}^{19}\text{F})$  [Hz] of F-PBDEs 35-F5' (**3d**), 47-F3 (**3g**), 99-F3' (**3i**), PBDEs 35 (**3d**), 47 (**3f**) and 99 (**3h**) in  $\text{CDCl}_3$ .

| BZ/BZL | #         | C-1    | C-2    | C-3    | C-4    | C-5    | C-6    |
|--------|-----------|--------|--------|--------|--------|--------|--------|
| 17-F5' | <b>3a</b> | 152.03 | 115.85 | 136.59 | 117.92 | 132.08 | 121.61 |
| 25-F5' | <b>3b</b> | 151.40 | 116.88 | 136.64 | 118.67 | 132.29 | 123.33 |
| 28-F3' | <b>3c</b> | 151.79 | 116.60 | 136.55 | 118.29 | 132.19 | 122.90 |
| 35     | <b>3d</b> | 156.48 | 124.22 | 125.63 | 119.10 | 134.55 | 119.49 |
| 35-F5' | <b>3e</b> | 155.42 | 120.06 | 125.85 | 120.12 | 134.74 | 124.92 |
| 47     | <b>3f</b> | 152.48 | 115.38 | 136.52 | 117.70 | 131.96 | 120.77 |
| 47-F3  | <b>3g</b> | 154.20 | 103.23 | 157.13 | 104.18 | 132.12 | 114.53 |
| 99     | <b>3h</b> | 153.02 | 115.82 | 137.58 | 119.93 | 124.38 | 123.06 |
| 99-F3' | <b>3i</b> | 152.46 | 114.01 | 137.72 | 120.79 | 124.52 | 124.11 |

| BZ/BZL | #         | C-1'   | C-2'   | C-3'   | C-4'   | C-5'   | C-6'   |
|--------|-----------|--------|--------|--------|--------|--------|--------|
| 17-F5' | <b>3a</b> | 154.10 | 108.36 | 134.63 | 112.49 | 162.53 | 106.88 |
| 25-F5' | <b>3b</b> | 158.62 | 116.48 | 123.23 | 114.32 | 163.43 | 104.31 |
| 28-F3' | <b>3c</b> | 157.30 | 106.53 | 159.65 | 102.78 | 134.04 | 114.41 |
| 35     | <b>3d</b> | 157.21 | 122.53 | 123.29 | 127.50 | 131.32 | 117.94 |
| 35-F5' | <b>3e</b> | 158.04 | 117.83 |        | 114.93 |        | 105.61 |
| 47     | <b>3f</b> | 152.48 | 115.38 | 136.52 | 117.70 | 131.96 | 120.77 |
| 47-F3  | <b>3g</b> | 151.92 | 115.94 | 136.66 | 118.19 | 132.14 | 121.77 |
| 99     | <b>3h</b> | 151.77 | 113.48 | 136.74 | 118.29 | 132.22 | 121.65 |
| 99-F3' | <b>3i</b> |        |        |        | 105.10 | 132.36 | 115.43 |

| BZL#          | #         | $^1J(\text{F,C})$ | $^2J(\text{F,C})$ | $^3J(\text{F,C})$ | $^4J(\text{F,C})$ |
|---------------|-----------|-------------------|-------------------|-------------------|-------------------|
| <b>17-F5'</b> | <b>3a</b> | C5'=249.0         | C4'=22.5;C6'=26.1 | C1'=10.1;C3'=9.2  | C2'=4.7           |
| <b>25-F5'</b> | <b>3b</b> | C5'=251.5         | C4'=24.7;C6'=25.2 | C1'=11.7;C3'=8.6  | C2'=3.4           |
| <b>28-F3'</b> | <b>3c</b> | C3'=249.2         | C2'=25.8;C4'=21.2 | C1'=9.5;C3'=1.6   | C6'=3.5           |
| <b>35-F5'</b> | <b>3e</b> |                   | C4'=23.4;C6'=25.7 |                   | C2'=3.5           |
| <b>47-F3</b>  | <b>3g</b> | C3=246.9          | C2=24.2; C4=22.7  | C1=12.5; C5=11.3  | C6=3.8            |
| <b>99-F3'</b> | <b>3i</b> |                   | C4'=22.8          |                   | C6'=3.8           |



**Table S5:**  $m/z$  values and relative abundance [%] of ions of PBDEs and F-PBDEs (**3a-i**) measured by GC-MS.

| BZ/BLZ#       | #         | $[^{13}\text{C M}]^+$ |    | $[\text{M}]^+$ |     | $[\text{M-Br}_2+1]^+$ |    | $[\text{M-Br}_2]^+$ |     | $[\text{C}_{11}(\text{F})\text{H}_x]^+$ |    |
|---------------|-----------|-----------------------|----|----------------|-----|-----------------------|----|---------------------|-----|-----------------------------------------|----|
| <b>17F-5'</b> | <b>3a</b> | 429                   | 2  | 428            | 20  | 265                   | 15 | 264                 | 100 | 157                                     | 43 |
|               |           | 427                   | 7  | 426            | 58  | 267                   | 12 | 266                 | 97  | F;                                      |    |
|               |           | 425                   | 8  | 424            | 58  |                       |    |                     |     | x=6                                     |    |
|               |           | 423                   | 3  | 422            | 21  |                       |    |                     |     |                                         |    |
| <b>25F-5'</b> | <b>3b</b> | 429                   | 1  | 428            | 10  | 267                   | 15 | 266                 | 100 | 157                                     | 33 |
|               |           | 427                   | 4  | 426            | 31  | 265                   | 12 | 264                 | 95  | F;                                      |    |
|               |           | 425                   | 4  | 424            | 30  |                       |    |                     |     | x=6                                     |    |
|               |           | 423                   | 1  | 422            | 11  |                       |    |                     |     |                                         |    |
| <b>28F-3'</b> | <b>3c</b> | 429                   | 2  | 428            | 15  | 267                   | 11 | 266                 | 98  | 157                                     | 49 |
|               |           | 427                   | 6  | 426            | 47  | 265                   | 15 | 264                 | 100 | F;                                      |    |
|               |           | 425                   | 6  | 424            | 47  |                       |    |                     |     | x=6                                     |    |
|               |           | 423                   | 2  | 422            | 17  |                       |    |                     |     |                                         |    |
| <b>35</b>     | <b>3d</b> | 411                   | 3  | 410            | 31  | 249                   | 4  | 248                 | 30  | 139                                     | 50 |
|               |           | 409                   | 13 | 408            | 97  | 247                   | 5  | 246                 | 33  | x=7                                     |    |
|               |           | 407                   | 13 | 406            | 100 |                       |    |                     |     |                                         |    |
|               |           | 405                   | 4  | 404            | 35  |                       |    |                     |     |                                         |    |
| <b>35F-5'</b> | <b>3e</b> | 429                   | 3  | 428            | 33  | 267                   | 5  | 266                 | 41  | 157                                     | 66 |
|               |           | 427                   | 13 | 426            | 100 | 265                   | 7  | 264                 | 43  | F;                                      |    |
|               |           | 425                   | 13 | 424            | 99  |                       |    |                     |     | x=6                                     |    |
|               |           | 423                   | 4  | 422            | 37  |                       |    |                     |     |                                         |    |
| <b>47</b>     | <b>3f</b> | 491                   | 2  | 490            | 17  | 329                   | 6  | 328                 | 42  | 138                                     | 11 |
|               |           | 489                   | 8  | 488            | 65  | 327                   | 12 | 326                 | 87  | x=6                                     |    |
|               |           | 487                   | 14 | 486            | 100 | 325                   | 7  | 324                 | 46  |                                         |    |
|               |           | 485                   | 9  | 484            | 70  |                       |    |                     |     |                                         |    |
|               |           | 483                   | 0  | 482            | 18  |                       |    |                     |     |                                         |    |
| <b>47F-3</b>  | <b>3g</b> | 509                   | 2  | 508            | 13  | 347                   | 6  | 346                 | 48  | 156                                     | 18 |
|               |           | 507                   | 6  | 506            | 50  | 345                   | 12 | 344                 | 100 | F;                                      |    |
|               |           | 505                   | 10 | 504            | 77  | 343                   | 8  | 342                 | 50  | x=5                                     |    |
|               |           | 503                   | 6  | 502            | 52  |                       |    |                     |     |                                         |    |
|               |           | 502                   | 2  | 500            | 14  |                       |    |                     |     |                                         |    |
| <b>99</b>     | <b>3h</b> | 571                   | 1  | 570            | 7   | 409                   | 4  | 408                 | 31  | 137                                     | 21 |
|               |           | 569                   | 4  | 568            | 35  | 407                   | 12 | 406                 | 95  | x=5                                     |    |
|               |           | 567                   | 8  | 566            | 69  | 405                   | 13 | 404                 | 100 |                                         |    |
|               |           | 565                   | 9  | 564            | 71  | 403                   | 5  | 402                 | 33  |                                         |    |
|               |           | 563                   | 4  | 562            | 37  |                       |    |                     |     |                                         |    |
|               |           | 561                   | 1  | 560            | 7   |                       |    |                     |     |                                         |    |
| <b>99F-3'</b> | <b>3i</b> | 589                   | 1  | 588            | 7   | 427                   | 4  | 426                 | 31  | 155                                     | 23 |
|               |           | 587                   | 4  | 586            | 32  | 425                   | 12 | 424                 | 91  | F;                                      |    |
|               |           | 585                   | 8  | 584            | 64  | 423                   | 13 | 422                 | 100 | x=4                                     |    |
|               |           | 583                   | 9  | 582            | 67  | 421                   | 5  | 420                 | 35  |                                         |    |
|               |           | 581                   | 4  | 580            | 34  |                       |    |                     |     |                                         |    |
|               |           | 579                   | 1  | 578            | 7   |                       |    |                     |     |                                         |    |
